# Supplementary material for: Deviance in Fetal Growth and Risk of Autism Spectrum Disorder
Source: Atypon-hosted journal article supplement (doi:10.1176/appi.ajp.2012.12040543), 2013-04-01
Supplement: 391_ds001.pdf [file 391_ds001.pdf]

Figure for Supplementary Material.

Data showing sequential exclusions to derive the final study population

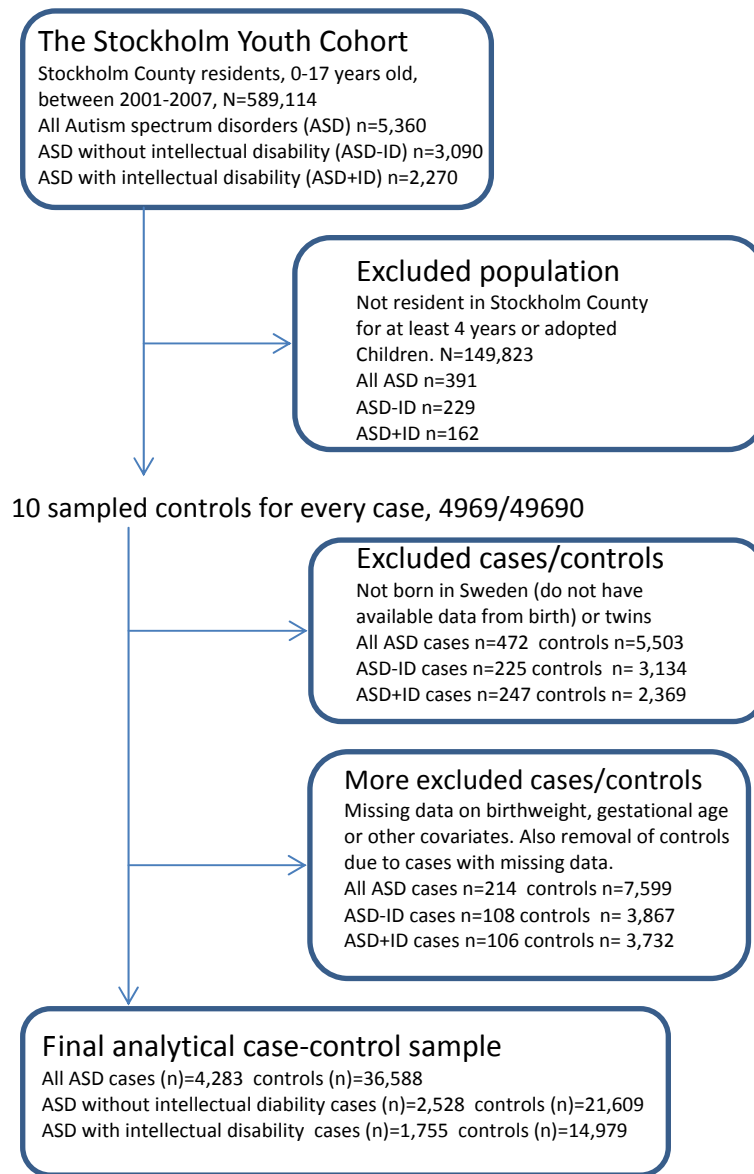

**Table 1a Characteristics of autism spectrum disorder with intellectual disability (ASD+ID) cases and controls in the Stockholm Youth Cohort**

| Characteristic                        | CASES<br>(N=1,755) |             | CONTROLS<br>(N=14,979) |             | P-value <sup>a</sup> |
|---------------------------------------|--------------------|-------------|------------------------|-------------|----------------------|
|                                       | n                  | %           | n                      | %           |                      |
| <i>Birth weight (g):</i>              |                    |             |                        |             |                      |
| 500-2499                              | 110                | 6.3         | 465                    | 3.1         |                      |
| 2500-4499                             | 1572               | 89.6        | 13,984                 | 93.4        | <0.001               |
| 4500+                                 | 73                 | 4.2         | 530                    | 3.5         |                      |
| <i>Gestational age (weeks):</i>       |                    |             |                        |             |                      |
| <33                                   | 40                 | 2.3         | 98                     | 0.7         |                      |
| 33-36                                 | 98                 | 5.6         | 622                    | 4.2         | <0.001               |
| 37-41                                 | 1448               | 82.5        | 13,026                 | 87.0        |                      |
| 42+                                   | 169                | 9.6         | 1233                   | 8.2         |                      |
| <i>Parental psychiatric history:</i>  |                    |             |                        |             |                      |
| Mother admitted                       | 194                | 11.1        | 1013                   | 6.8         | <0.001               |
| Father admitted                       | 190                | 10.8        | 1049                   | 7.0         | <0.001               |
| <i>Household income:</i>              |                    |             |                        |             |                      |
| Lowest 2 quintiles                    | 792                | 45.1        | 5422                   | 36.2        | <0.001               |
| <i>Occupational social class:</i>     |                    |             |                        |             |                      |
| Unskilled manual worker               | 311                | 17.7        | 2065                   | 13.8        | <0.001               |
| <i>Mother's region of birth</i>       |                    |             |                        |             |                      |
| Sweden                                | 1226               | 69.9        | 11,699                 | 78.1        |                      |
| Other                                 | 529                | 30.1        | 3280                   | 21.9        | <0.001               |
| <i>Maternal gestational diabetes:</i> | 8                  | 0.5         | 48                     | 0.3         | =0.35                |
| <i>Gestational hypertension:</i>      | 5                  | 0.3         | 49                     | 0.3         | =0.77                |
| <i>Congenital malformation:</i>       | 111                | 6.3         | 439                    | 2.9         | <0.001               |
|                                       |                    | <b>Mean</b> |                        | <b>Mean</b> | <b>P-value</b>       |
| <i>Mean age at delivery:</i>          |                    |             |                        |             |                      |
| Mother                                |                    | 29.9        |                        | 29.5        | <0.01                |
| Father                                |                    | 33.3        |                        | 32.3        | <0.001               |

<sup>a</sup> For variables with multiple categories, the p-value reported is the overall value across all categories

**Table 1b Characteristics of autism spectrum disorder without intellectual disability (ASD-ID) cases and controls in the Stockholm Youth Cohort**

| Characteristic                        | CASES<br>(N=2,528) |             | CONTROLS<br>(N=21,609) |             | P-value <sup>a</sup> |
|---------------------------------------|--------------------|-------------|------------------------|-------------|----------------------|
|                                       | n                  | %           | n                      | %           |                      |
| <i>Birth weight (g):</i>              |                    |             |                        |             |                      |
| 500-2499                              | 129                | 5.1         | 689                    | 3.2         |                      |
| 2500-4499                             | 2287               | 90.5        | 20,127                 | 93.1        | <0.001               |
| 4500+                                 | 112                | 4.4         | 793                    | 3.7         |                      |
| <i>Gestational age (weeks):</i>       |                    |             |                        |             |                      |
| <33                                   | 36                 | 1.4         | 193                    | 0.9         |                      |
| 33-36                                 | 127                | 5.0         | 864                    | 4.0         | <0.01                |
| 37-41                                 | 2136               | 84.5        | 18,703                 | 86.6        |                      |
| 42+                                   | 229                | 9.1         | 1849                   | 8.6         |                      |
| <i>Parental psychiatric history:</i>  |                    |             |                        |             |                      |
| Mother admitted                       | 342                | 13.5        | 1508                   | 7.0         | <0.001               |
| Father admitted                       | 289                | 11.4        | 1445                   | 6.7         | <0.001               |
| <i>Household income:</i>              |                    |             |                        |             |                      |
| Lowest 2 quintiles                    | 954                | 37.7        | 7751                   | 35.9        | =0.06                |
| <i>Occupational social class:</i>     |                    |             |                        |             |                      |
| Unskilled manual worker               | 444                | 17.6        | 2968                   | 13.7        | <0.001               |
| <i>Mother's region of birth</i>       |                    |             |                        |             |                      |
| Sweden                                | 2082               | 82.4        | 16,749                 | 77.5        |                      |
| Other                                 | 446                | 17.6        | 4860                   | 22.5        | <0.001               |
| <i>Maternal gestational diabetes:</i> | 13                 | 0.5         | 89                     | 0.4         | =0.45                |
| <i>Gestational hypertension:</i>      | 7                  | 0.3         | 61                     | 0.3         | =0.96                |
| <i>Congenital malformation:</i>       | 107                | 4.2         | 615                    | 2.8         | <0.001               |
|                                       |                    | <b>Mean</b> |                        | <b>Mean</b> | <b>P-value</b>       |
| <i>Mean age at delivery:</i>          |                    |             |                        |             |                      |
| Mother                                |                    | 29.4        |                        | 29.4        | =0.89                |
| Father                                |                    | 32.2        |                        | 32.4        | =0.38                |

<sup>a</sup> For variables with multiple categories, the p-value reported is the overall value across all categories

**Table 2a Relative risk of autism spectrum disorder (ASD) by fetal growth z-score: Girls**

| Fetal growth z-score | CASES (N=4283) |      | CONTROLS (N=36,588) |      | Univariate: |                    | Multivariate:            |                    |
|----------------------|----------------|------|---------------------|------|-------------|--------------------|--------------------------|--------------------|
|                      | n              | %    | n                   | %    | Odds Ratio  | (95% CI)           | Adjusted OR <sup>a</sup> | (95% CI)           |
| < -2.00              | 53             | 4.6  | 291                 | 2.9  | <b>1.70</b> | <b>(1.24-2.32)</b> | <b>1.58</b>              | <b>(1.15-2.17)</b> |
| -1.51 to -2.00       | 61             | 5.2  | 471                 | 4.7  | 1.20        | (0.90-1.60)        | 1.18                     | (0.88-1.57)        |
| -1.01 to -1.50       | 133            | 11.4 | 1020                | 10.2 | 1.20        | (0.98-1.48)        | 1.22                     | (0.99-1.50)        |
| -0.51 to -1.00       | 180            | 15.5 | 1660                | 16.6 | 1.00        | (0.84-1.21)        | 1.02                     | (0.84-1.22)        |
| -0.50 to 0.50 (ref.) | 420            | 36.1 | 3886                | 39.0 | 1.00        | -                  | 1.00                     | -                  |
| 0.51 to 1.00         | 125            | 10.7 | 1268                | 12.7 | 0.91        | (0.74-1.12)        | 0.91                     | (0.73-1.12)        |
| 1.01 to 1.50         | 88             | 7.6  | 727                 | 7.3  | 1.12        | (0.88-1.44)        | 1.09                     | (0.86-1.40)        |
| 1.51 to 2.00         | 48             | 4.1  | 363                 | 3.6  | 1.23        | (0.90-1.69)        | 1.21                     | (0.88-1.67)        |
| > 2.00               | 55             | 4.7  | 284                 | 2.8  | <b>1.80</b> | <b>(1.32-2.44)</b> | <b>1.71</b>              | <b>(1.26-2.34)</b> |

<sup>a</sup> Odds ratio adjusted for maternal age, paternal age, parental psychiatric admission (pre-birth), family income at birth, occupational status at birth, mother's country of birth (region), maternal gestational diabetes, gestational hypertension, congenital malformation in the child

**Table 2b Relative risk of autism spectrum disorder (ASD) by fetal growth z-score: Boys**

| Fetal growth z-score | CASES (N=4283) |      | CONTROLS (N=36,588) |      | Univariate: |                    | Multivariate:            |                    |
|----------------------|----------------|------|---------------------|------|-------------|--------------------|--------------------------|--------------------|
|                      | n              | %    | n                   | %    | Odds Ratio  | (95% CI)           | Adjusted OR <sup>a</sup> | (95% CI)           |
| < -2.00              | 142            | 4.6  | 664                 | 2.5  | <b>1.90</b> | <b>(1.57-2.30)</b> | <b>1.76</b>              | <b>(1.45-2.14)</b> |
| -1.51 to -2.00       | 169            | 5.4  | 1183                | 4.4  | <b>1.26</b> | <b>(1.06-1.50)</b> | <b>1.23</b>              | <b>(1.04-1.47)</b> |
| -1.01 to -1.50       | 308            | 9.9  | 2553                | 9.6  | 1.07        | (0.94-1.22)        | 1.04                     | (0.91-1.19)        |
| -0.51 to -1.00       | 497            | 15.9 | 4270                | 16.0 | 1.02        | (0.91-1.14)        | 1.02                     | (0.91-1.14)        |
| -0.50 to 0.50 (ref.) | 1173           | 37.6 | 10,324              | 38.8 | 1.00        | -                  | 1.00                     | -                  |
| 0.51 to 1.00         | 379            | 12.1 | 3620                | 13.3 | 0.92        | (0.82-1.04)        | 0.92                     | (0.81-1.04)        |
| 1.01 to 1.50         | 220            | 7.1  | 2224                | 8.4  | 0.87        | (0.75-1.01)        | <b>0.86</b>              | <b>(0.73-1.00)</b> |
| 1.51 to 2.00         | 103            | 3.3  | 1016                | 3.8  | 0.90        | (0.73-1.11)        | 0.88                     | (0.72-1.10)        |
| > 2.00               | 129            | 4.1  | 764                 | 2.9  | <b>1.48</b> | <b>(1.22-1.81)</b> | <b>1.41</b>              | <b>(1.16-1.73)</b> |

<sup>a</sup> Odds ratio adjusted for maternal age, paternal age, parental psychiatric admission (pre-birth), family income at birth, occupational status at birth, mother's country of birth (region), maternal gestational diabetes, gestational hypertension, congenital malformation in the child
